# Supplementary material for: Selective catalytic reduction of NO by propane over CoOx/Al2O3: an investigation of the surface reactions using in situ infrared spectroscopy
Source: Royal Society of Chemistry journal article supplement (doi:10.1039/b514371c), 2005-12-01
Supplement: b514371c.pdf [file b514371c.pdf]

Reference 27, b): Supplementary information:

Table S1

Catalytic performance of SCR of NO by C<sub>3</sub>H<sub>8</sub> over Al<sub>2</sub>O<sub>3</sub> and CoO<sub>x</sub>/Al<sub>2</sub>O<sub>3</sub>:

| Catalyst                                         | Temperature | X <sub>NO</sub> <sup>a</sup> | X <sub>C<sub>3</sub>H<sub>8</sub></sub> <sup>b</sup> | X <sub>NO</sub> :X <sub>C<sub>3</sub>H<sub>8</sub></sub> | NOCF <sup>c</sup> |
|--------------------------------------------------|-------------|------------------------------|------------------------------------------------------|----------------------------------------------------------|-------------------|
|                                                  | (K)         | (%)                          | (%)                                                  |                                                          | (%)               |
| Al <sub>2</sub> O <sub>3</sub>                   | 573         | 1.9                          | -                                                    | -                                                        | -                 |
|                                                  | 623         | 10.1                         | 1.7                                                  | 5.9                                                      | 59.4              |
|                                                  | 673         | 23.1                         | 6.7                                                  | 3.4                                                      | 34.3              |
|                                                  | 723         | 55.9                         | 22.0                                                 | 2.5                                                      | 25.4              |
| CoO <sub>x</sub> /Al <sub>2</sub> O <sub>3</sub> | 573         | 5.5                          | 1.2                                                  | 4.6                                                      | 45.8              |
|                                                  | 623         | 22.7                         | 8.3                                                  | 2.7                                                      | 27.3              |
|                                                  | 673         | 98.8                         | 43.2                                                 | 2.3                                                      | 22.9              |
|                                                  | 723         | 100                          | 60.9                                                 | 1.6                                                      | 16.4              |

<sup>a</sup> NO conversion:  $([\text{NO}]_{\text{inlet}} - [\text{NO}]_{\text{outlet}}) / [\text{NO}]_{\text{inlet}} \times 100\%$ ;

<sup>b</sup> C<sub>3</sub>H<sub>8</sub> conversion:  $([\text{C}_3\text{H}_8]_{\text{inlet}} - [\text{C}_3\text{H}_8]_{\text{outlet}}) / [\text{C}_3\text{H}_8]_{\text{inlet}} \times 100\%$ ;

<sup>c</sup> NO competitiveness factor:  $([\text{NO}]_{\text{inlet}} - [\text{NO}]_{\text{outlet}}) / \{10 \times ([\text{C}_3\text{H}_8]_{\text{inlet}} - [\text{C}_3\text{H}_8]_{\text{outlet}})\} \times 100\%$ .
